# Supplementary material for: Two-year effects of semaglutide in adults with overweight or obesity: the STEP 5 trial
Source: PubMed Central journal article supplement (PMC9556320; doi:10.1038/s41591-022-02026-4), 2022-10-10
Supplement: 41591_2022_2026_MOESM1_ESM.pdf [file 41591_2022_2026_MOESM1_ESM.pdf]

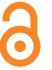

---

# Two-year effects of semaglutide in adults with overweight or obesity: the STEP 5 trial

---

In the format provided by the authors and unedited

## Supplementary information

### Contents

|                                                                                                                                                                                                                                                       |   |
|-------------------------------------------------------------------------------------------------------------------------------------------------------------------------------------------------------------------------------------------------------|---|
| List of investigators in the Semaglutide Treatment Effect in People with Obesity (STEP) 5 trial.....                                                                                                                                                  | 2 |
| Supplementary tables .....                                                                                                                                                                                                                            | 3 |
| Supplementary Table 1   Co-primary, confirmatory secondary, and selected supportive secondary and exploratory trial endpoints (trial product estimand).*                                                                                              | 3 |
| Supplementary Table 2   Malignant neoplasms by system organ class and preferred term (in-trial).*                                                                                                                                                     | 6 |
| Supplementary Table 3   Supportive secondary safety endpoints (on-treatment).*                                                                                                                                                                        | 7 |
| Supplementary Table 4   Statistical analysis methodology: analysis and imputation methods to address the treatment policy and trial product estimands for the primary and confirmatory secondary endpoints in the statistical testing hierarchy. .... | 8 |

## List of investigators in the Semaglutide Treatment Effect in People with Obesity (STEP) 5 trial

**Canada:** Ronald Akhras (Centre Medical Acadie, Montreal), Adam Blackman (Toronto Sleep Institute, Toronto), Daniel Landry (G.A. Research Associates Ltd., Moncton), Derek Lowe (Ocean West Research Clinic, Surrey), Thomas Ransom (Nova Scotia Health Authority, Halifax), Oren Steen (LMC Endocrinology Centres [Toronto] Ltd., Toronto), Richard Tytus (Hamilton Medical Research Group, Hamilton), S. Weisnagel (CHU de Quebec-Universite Laval, Quebec), Sean Wharton (The Wharton Medical Clinic, Hamilton)

**Hungary:** Péter Faludi (Dr. Vass László Egészségügyi Intézmény Diab. Szakrendelés, Budapest), Iván Ory (MH Egészségügyi Központ, Budapest), Gizella Petro (Kenezy Korház, Debrecen), Katalin Revesz (Selye János Kórház és Rendelőintézet, Komárom), Zsolt Sudár (Tolna megyei Balassa János Kórház, Szekszárd), Tímea Tanczer (MED-TIMA Kft., Budapest)

**Italy:** Silvio Buscemi (Policlinico University Hospital, Palermo), Cristina Ciuoli (Azienda Ospedaliera Universitaria Senese, Siena), Geltrude Mingrone (Fondazione Policlinico Universitario Agostino Gemelli IRCCS, Rome), Uberto Pagotto (A.O. Universitaria S.ORSOLA-MALPIGHI – U.O. Endocrinologia Bologna), Ferruccio Santini (Azienda Ospedaliero Universitaria Pisana Ospedale Cisanello, Pisa)

**Spain:** Juan José Gorgojo Martínez (Hospital Fundación Alcorcón, Alcorcón), Esteban Jódar (Hospital Universitario QuironSalud Madrid, Pozuelo de Alarcón), Pedro Mezquita Raya (Hospital Univer.Torrecárdenas, Almería), Margarita Rivas Fernández (Hospital Quirónsalud Infanta Luisa, Sevilla), Francisco Javier Salvador Rodríguez (Clínica Universitaria de Navarra, Pamplona), Nuria Vilarrasa (Hospital Universitari de Bellvitge, Hospitalet de Llobregat)

**United States:** Thomas Blevins (Texas Diabetes & Endocrinology, P.A., Austin), Kenneth Cohen (New West Physicians, Inc., Golden), Matthew Davis (Rochester Clinical Research, Inc., Rochester), H. Jackson Downey (Westside Center For Clinical Research, Jacksonville), Juan Frias (National Research Institute, Los Angeles), W. Timothy Garvey (University of Alabama Birmingham, Birmingham), Gregg Gerety (Albany Medical College, Albany), David Morin (Holston Medical Group, Kingsport), John Nardandrea, Jr (Renstar Medical Research, Ocala), Kerem Ozer (Texas Diabetes & Endocrinology, P.A., Austin), John Pullman (Mercury Street Medical Group, PLLC, Butte), Domenica Rubino (Washington Center for Weight Management and Research, Inc., Arlington), Timothy Smith (StudyMetrix Research LLC, St. Peters), Joseph Soufer (Chase Medical Research LLC, Waterbury), Holly Wyatt (University of Colorado, Aurora)

## Supplementary tables

**Supplementary Table 1 | Co-primary, confirmatory secondary, and selected supportive secondary and exploratory trial endpoints (trial product estimand).\***

|                                                                       | <b>Semaglutide<br/>(n=152)</b> | <b>Placebo<br/>(n=152)</b> | <b>Treatment comparison (95% CI)<sup>†</sup></b> |
|-----------------------------------------------------------------------|--------------------------------|----------------------------|--------------------------------------------------|
| <b>Co-primary endpoints</b>                                           |                                |                            |                                                  |
| Body weight change from baseline to week 104, %                       | -16.7% (0.9)                   | -0.6% (0.9)                | ETD -16.0 (-18.6 to -13.5)                       |
| ≥5% weight loss at week 104                                           | 110/132 (83.3%)                | 38/109 (34.9%)             | OR 18.1 (10.0 to 32.5)                           |
| <b>Confirmatory secondary endpoints</b>                               |                                |                            |                                                  |
| ≥10% weight loss at week 104                                          | 89/132 (67.4%)                 | 14/109 (12.8%)             | OR 17.6 (9.4 to 32.9)                            |
| ≥15% weight loss at week 104                                          | 75/132 (56.8%)                 | 7/109 (6.4%)               | OR 23.6 (10.4 to 53.8)                           |
| Waist circumference – change from baseline to week 104, cm            | -15.8 (0.9)                    | -3.7 (1.0)                 | ETD -12.1 (-14.7 to -9.4)                        |
| Systolic blood pressure – change from baseline to week 104, mm Hg     | -6.1 (1.2)                     | -0.1 (1.2)                 | ETD -6.1 (-9.4 to -2.7)                          |
| <b>Supportive secondary endpoints</b>                                 |                                |                            |                                                  |
| ≥20% weight loss at week 104                                          | 52/132 (39.4%)                 | 3/109 (2.8%)               | OR 26.7 (8.1 to 87.7)                            |
| Body weight                                                           |                                |                            |                                                  |
| Change from baseline to week 104, kg                                  | -17.6 (1.0)                    | -0.8 (1.0)                 | ETD -16.8 (-19.7 to -13.9)                       |
| Change from baseline to week 52, %                                    | -16.6% (0.7)                   | -2.3% (0.7)                | ETD -14.3% (-16.1% to -12.4%)                    |
| Body-mass index – change from baseline to week 104, kg/m <sup>2</sup> | -6.5 (0.4)                     | -0.3 (0.4)                 | ETD -6.2 (-7.3 to -5.1)                          |
| HbA <sub>1c</sub> – change from baseline to week 104, %               | -0.5 (0.02)                    | -0.1 (0.02)                | ETD -0.4 (-0.5 to -0.3)                          |

|                                                                          |             |            |                                                                       |
|--------------------------------------------------------------------------|-------------|------------|-----------------------------------------------------------------------|
| Fasting plasma glucose – change from baseline to week 104, mmol/L        | –0.5 (0.04) | 0.1 (0.05) | ETD –0.6 (–0.7 to –0.5)                                               |
| Diastolic blood pressure – change from baseline to week 104, mm Hg       | –4.4 (0.8)  | –0.7 (0.8) | ETD –3.7 (–5.8 to –1.5)                                               |
| Fasting serum insulin – change from baseline to week 104, % <sup>‡</sup> | –36.0%      | –8.7%      | Estimated relative percentage difference<br>–30.0% (–39.5% to –18.9%) |
| Lipids – change from baseline to week 104, % <sup>‡</sup>                |             |            |                                                                       |
| Total cholesterol                                                        | –4.6%       | 2.4%       | Estimated relative percentage difference<br>–6.8% (–9.9% to –3.5%)    |
| HDL cholesterol                                                          | 10.3%       | 7.4%       | Estimated relative percentage difference<br>2.7% (–1.8% to 7.3%)      |
| LDL cholesterol                                                          | –8.0%       | 0.5%       | Estimated relative percentage difference<br>–8.4% (–13.1% to –3.4%)   |
| VLDL cholesterol                                                         | –22.4%      | 1.0%       | Estimated relative percentage difference<br>–23.2% (–29.7% to –16.2%) |
| Free fatty acids                                                         | –4.2%       | 6.0%       | Estimated relative percentage difference<br>–9.6% (–21.2% to 3.7%)    |
| Triglycerides                                                            | –22.6%      | 2.0%       | Estimated relative percentage difference<br>–24.1% (–30.6% to –16.9%) |
| C-reactive protein – change from baseline to week 104, % <sup>‡</sup>    | –59.5%      | –8.0%      | Estimated relative percentage difference<br>–56.0% (–66.0% to –43.1%) |

Data are mean (standard error) or observed n/N (%) unless stated otherwise. Participants in the full analysis set are included in the treatment comparisons. \*The trial product estimand assesses treatment effect if trial product was taken as intended (i.e., if all participants adhered to treatment and did not receive rescue intervention); see Table 2 for corresponding data for the treatment policy estimand. Continuous endpoint analyses were conducted using a mixed model for repeated measures (MMRM) with randomized treatment as a factor and baseline endpoint value as a covariate. Analyses of categorical endpoints were conducted with the use of logistic regression, with categorization for missing data based on values predicted from the MMRM. Analyses of endpoints for the trial product estimand were not adjusted for multiplicity. <sup>†</sup>The difference is the estimated treatment difference between the groups except in the case of fasting serum insulin, lipid, and C-reactive protein levels, for which the comparison is the estimated relative percentage difference between groups. <sup>‡</sup>These

parameters were initially analyzed on a log scale as estimated ratio to baseline (within treatment groups) and estimated treatment ratios (between treatment groups). For interpretation, these data are expressed as relative percentage change and estimated relative percentage difference between groups, respectively, and were calculated with the following formula:  $(\text{estimated ratio} - 1) \times 100$ . CI, confidence interval; HDL, high-density lipoprotein; LDL, low-density lipoprotein; SEM, standard error of the mean; VLDL, very-low-density lipoprotein.

**Supplementary Table 2 | Malignant neoplasms by system organ class and preferred term (in-trial).\***

|                                                                           | Semaglutide (n=152) |        |                              | Placebo (n=152) |        |                              |
|---------------------------------------------------------------------------|---------------------|--------|------------------------------|-----------------|--------|------------------------------|
|                                                                           | Participants        | Events | Events per 100 patient-years | Participants    | Events | Events per 100 patient-years |
| Neoplasms benign, malignant, and unspecified (including cysts and polyps) | 2 (1.3%)            | 2      | 0.6                          | 4 (2.6%)        | 4      | 1.3                          |
| Basal cell carcinoma                                                      | 1 (0.7%)            | 1      | 0.3                          | 0 (0.0%)        |        |                              |
| Bowen's disease                                                           | 1 (0.7%)            | 1      | 0.3                          | 0 (0.0%)        |        |                              |
| Invasive ductal breast carcinoma                                          | 0 (0.0%)            |        |                              | 2 (1.3%)        | 2      | 0.7                          |
| Lung adenocarcinoma                                                       | 0 (0.0%)            |        |                              | 1 (0.7%)        | 1      | 0.3                          |
| Small cell lung cancer metastatic                                         | 0 (0.0%)            |        |                              | 1 (0.7%)        | 1      | 0.3                          |

\*Events observed during the in-trial period (the time from random assignment to last contact with a trial site, regardless of treatment discontinuation or rescue intervention).

**Supplementary Table 3 | Supportive secondary safety endpoints (on-treatment).\***

|                                                                                  | Semaglutide 2.4 mg |                  | Placebo |             |
|----------------------------------------------------------------------------------|--------------------|------------------|---------|-------------|
|                                                                                  | N                  | Mean             | N       | Mean        |
| <b>Pulse – bpm</b>                                                               |                    |                  |         |             |
| Baseline                                                                         | 152                | 73±11            | 152     | 72±9        |
| Week 104                                                                         | 130                | 76±9             | 106     | 71±10       |
| Change from baseline to week 104 <sup>†</sup>                                    | 111                | 3.3              | 96      | -0.8        |
| Estimated treatment difference<br>(semaglutide vs placebo) [95% CI] <sup>†</sup> |                    | 4.1 (2.0 to 6.2) |         |             |
| <b>Amylase – U/L</b>                                                             |                    |                  |         |             |
| Baseline                                                                         | 152                | 50 (39.7)        | 152     | 52 (33.9)   |
| Week 104                                                                         | 130                | 57 (42.0)        | 106     | 52 (33.3)   |
| Ratio to baseline at week 104                                                    | 130                | 1.13 (20.7)      | 106     | 1.02 (15.1) |
| <b>Lipase – U/L</b>                                                              |                    |                  |         |             |
| Baseline                                                                         | 152                | 22 (54.4)        | 152     | 23 (51.3)   |
| Week 104                                                                         | 130                | 33 (64.6)        | 106     | 23 (52.0)   |
| Ratio to baseline at week 104                                                    | 130                | 1.47 (52.3)      | 106     | 1.00 (34.4) |
| <b>Calcitonin – ng/L</b>                                                         |                    |                  |         |             |
| Baseline                                                                         | 152                | 1.3 (75.8)       | 152     | 1.3 (82.1)  |
| Week 104                                                                         | 124                | 1.3 (69.6)       | 102     | 1.4 (83.1)  |
| Ratio to baseline at week 104                                                    | 124                | 0.99 (21.5)      | 102     | 0.97 (41.0) |

Data are descriptive statistics presented as arithmetic mean ± standard deviation or geometric mean (coefficient of variation), unless indicated otherwise. \*During treatment with trial product (any dose of trial medication administered within the previous 2 weeks (i.e., any period of temporary treatment interruption with trial product was excluded)). <sup>†</sup>Trial product estimand data (assesses treatment effect if trial product was taken as intended (i.e., if all participants adhered to treatment and did not receive rescue intervention)) analyzed using a mixed model for repeated measurements. CI, confidence interval.



**Supplementary Table 4 | Statistical analysis methodology: analysis and imputation methods to address the treatment policy and trial product estimands for the primary and confirmatory secondary endpoints in the statistical testing hierarchy.**

| Objective                               | Endpoint        | Test order | Endpoint type | Estimand          | Analysis set | Statistical model | Imputation approach | Sensitivity analyses                                       |
|-----------------------------------------|-----------------|------------|---------------|-------------------|--------------|-------------------|---------------------|------------------------------------------------------------|
| <b>Primary endpoints</b>                |                 |            |               |                   |              |                   |                     |                                                            |
| Primary                                 | % weight change | 1          | Continuous    | Treatment policy* | FAS          | ANCOVA            | RD-MI               | J2R-MI<br>S1-SI<br>S2-SI<br>TP-MI<br>MMRM                  |
|                                         |                 |            |               | Trial product†    | FAS          | MMRM              |                     |                                                            |
| Primary                                 | 5% responders   | 2          | Binary        | Treatment policy* | FAS          | LR                | RD-MI               | J2R-MI<br>S1-SI<br>S2-SI<br>TP-MI<br>MMRM<br>Non-responder |
|                                         |                 |            |               | Trial product†    | FAS          | LR                | MMRM                |                                                            |
| <b>Confirmatory secondary endpoints</b> |                 |            |               |                   |              |                   |                     |                                                            |
| Primary                                 | 10% responders  | 3          | Binary        | Treatment policy* | FAS          | LR                | RD-MI               | Non-responder                                              |
|                                         |                 |            |               | Trial product†    | FAS          | LR                | MMRM                |                                                            |
| Primary                                 | 15% responders  | 4          | Binary        | Treatment policy* | FAS          | LR                | RD-MI               | Non-responder                                              |

|           |                                        |   |            |                            |     |        |       |        |
|-----------|----------------------------------------|---|------------|----------------------------|-----|--------|-------|--------|
|           |                                        |   |            | Trial product <sup>†</sup> | FAS | LR     | MMRM  |        |
| Primary   | Waist circumference change (cm)        | 5 | Continuous | Treatment policy*          | FAS | ANCOVA | RD-MI | J2R-MI |
|           |                                        |   |            | Trial product <sup>†</sup> | FAS | MMRM   |       |        |
| Secondary | Systolic blood pressure change (mm Hg) | 6 | Continuous | Treatment policy*          | FAS | ANCOVA | RD-MI | J2R-MI |
|           |                                        |   |            | Trial product <sup>†</sup> | FAS | MMRM   |       |        |

\*Designated as the primary estimand. <sup>†</sup>Designated as the secondary estimand. Test order refers to the order of the endpoint in the statistical test hierarchy. All analyses were performed using the full analysis set. All statistical tests were two-sided. ANCOVA, analysis of covariance; FAS, full analysis set; J2R-MI, jump to reference multiple imputation; LR, logistic regression; MMRM, mixed model for repeated measurements; RD-MI, multiple imputation using retrieved subjects; S1-SI and S2-SI, single imputation as done by Sacks; TP-MI, tipping point multiple imputation.
